# Supplementary material for: Process evaluation of the Bridging the Age Gap in Breast Cancer decision support intervention cluster randomised trial
Source: Springer Nature journal article supplement (doi:10.1186/s13063-021-05360-z), 2021-07-13

## **Process evaluation of the Bridging the Age Gap in Breast Cancer decision support intervention cluster randomised trial**

BURTON, Maria <<http://orcid.org/0000-0002-5411-8181>>, LIFFORD, Kate J., WYLD, Lynda, ARMITAGE, Fiona, RING, Alistair, NETTLESHIP, Anthony, COLLINS, Karen, MORGAN, Jenna, REED, Malcolm W. R., HOLMES, Geoffrey R., BRADBURN, Mike, GATH, Jacqui, GREEN, Tracy, REVELL, Deirdre, BRAIN, Kate, EDWARDS, Adrian, HARDER, Helena, WARD, Susan, RICHARDS, Paul, MARTIN, Charlene, CHATER, Tim, PEMBERTON, Kirsty, MURRAY, Christopher, WALTERS, Stephen, HERBERT, Esther, ROBINSON, Thompson, CHEUNG, Kwok Leung and AUDISIO, Riccardo

Available from Sheffield Hallam University Research Archive (SHURA) at:

<https://shura.shu.ac.uk/28832/>

---

This document is the Supplemental Material

### **Citation:**

BURTON, Maria, LIFFORD, Kate J., WYLD, Lynda, ARMITAGE, Fiona, RING, Alistair, NETTLESHIP, Anthony, COLLINS, Karen, MORGAN, Jenna, REED, Malcolm W. R., HOLMES, Geoffrey R., BRADBURN, Mike, GATH, Jacqui, GREEN, Tracy, REVELL, Deirdre, BRAIN, Kate, EDWARDS, Adrian, HARDER, Helena, WARD, Susan, RICHARDS, Paul, MARTIN, Charlene, CHATER, Tim, PEMBERTON, Kirsty, MURRAY, Christopher, WALTERS, Stephen, HERBERT, Esther, ROBINSON, Thompson, CHEUNG, Kwok Leung and AUDISIO, Riccardo (2021). Process evaluation of the Bridging the Age Gap in Breast Cancer decision support intervention cluster randomised trial. *Trials*, 22 (1), p. 447. [Article]

---

### **Copyright and re-use policy**

See <http://shura.shu.ac.uk/information.html>

## Treatment decision

To be completed by the treating clinician or clinical nurse specialist following the patient's treatment consultation.

### 1. Which treatment options were discussed?

(tick one only – complete an additional form if necessary)

☐ Chemotherapy or no chemotherapy

☐ Primary endocrine therapy or surgery and adjuvant endocrine therapy

### 2. Which components of the intervention tools were used and how?

#### a. Age Gap Online Decision Tool

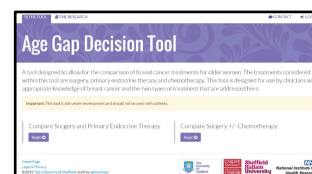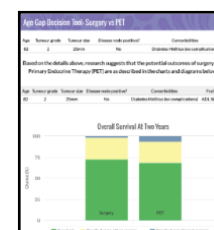

i. Used by the clinical staff to aid their decision making ☐ Yes ☐ No

Tick all that apply

- ☐ Not enough time
- ☐ Patient not felt suitable
- ☐ Not liked by clinical staff
- ☐ No online access in clinic

- ☐ Patient already made a decision
- ☐ Other \_\_\_\_\_

ii. Shown to the patient and discussed in the presence of the doctor or clinical nurse specialist

☐ Yes ☐ No

Tick all that apply

- ☐ Not enough time
- ☐ Patient not felt suitable
- ☐ Not liked by clinical staff
- ☐ No online access in clinic
- ☐ Other \_\_\_\_\_

- ☐ Patient too distressed
- ☐ Patient unable to understand
- ☐ Patient already made a decision
- ☐ Family/carer reluctance

iii. Print out taken home by patient

☐ Yes ☐ No

Tick all that apply

- ☐ Not enough time
- ☐ Patient not felt suitable
- ☐ Not liked by clinical staff
- ☐ No online access in clinic
- ☐ Not offered
- ☐ Other \_\_\_\_\_

- ☐ Patient too distressed
- ☐ Patient unable to understand
- ☐ Patient already made a decision
- ☐ Patient reluctance
- ☐ Family/carer reluctance

# Age Gap

## Baseline (RCT)

FOR OFFICE USE ONLY

Enrolment No.

|   |  |  |  |  |
|---|--|--|--|--|
| E |  |  |  |  |
|---|--|--|--|--|

## Treatment decision

### b. Option grid

#### i. Used within the consultation

☐ Yes

☐ No

Tick all that apply

☐ Not enough time

☐ Patient not felt suitable

☐ Not liked by clinical staff

☐ Not available in clinic

☐ Other \_\_\_\_\_

☐ Patient too distressed

☐ Patient unable to understand

☐ Patient already made a decision

☐ Patient reluctance

☐ Family/carer reluctance

#### ii. Taken home by patient

☐ Yes

☐ No

Tick all that apply

☐ Not enough time

☐ Patient not felt suitable

☐ Not liked by clinical staff

☐ Not available in clinic

☐ Not offered

☐ Other \_\_\_\_\_

☐ Patient too distressed

☐ Patient unable to understand

☐ Patient already made a decision

☐ Patient reluctance

☐ Family/carer reluctance

### c. Booklet "Deciding about your breast cancer treatment"

#### i. Used within the consultation

☐ Yes

☐ No

Tick all that apply

☐ Not enough time

☐ Patient not felt suitable

☐ Not liked by clinical staff

☐ Not available in clinic

☐ Other \_\_\_\_\_

☐ Patient too distressed

☐ Patient unable to understand

☐ Patient already made a decision

☐ Patient reluctance

☐ Family/carer reluctance

#### ii. Taken home by patient

☐ Yes

☐ No

Tick all that apply

☐ Not enough time

☐ Patient not felt suitable

☐ Not liked by clinical staff

☐ Not available in clinic

☐ Not offered

☐ Other \_\_\_\_\_

☐ Patient too distressed

☐ Patient unable to understand

☐ Patient already made a decision

☐ Patient reluctance

☐ Family/carer reluctance

Recent cancer diagnosis aged 70 years and over with a choice between hormone therapy or surgery and hormone therapy pills

Use this grid to help you and your healthcare professional decide the right treatment for you.

| Reasons for choosing pills                                                                           | Reasons for choosing surgery                                                                                                                                                                                                     |                                                                                                                                                                                                                                                                                                                                                                                              |
|------------------------------------------------------------------------------------------------------|----------------------------------------------------------------------------------------------------------------------------------------------------------------------------------------------------------------------------------|----------------------------------------------------------------------------------------------------------------------------------------------------------------------------------------------------------------------------------------------------------------------------------------------------------------------------------------------------------------------------------------------|
| What does the treatment involve?                                                                     | Having a pill every day or taking a pill every 12 hours. The hormone therapy pills are not a type of chemotherapy.                                                                                                               | As operations to remove the cancer usually involve general anaesthesia, under your anaesthetic, some or all of the glands under your arms may be removed and part of the breast may be removed. Some women go home the same day. Other women go home the next day. The pills are usually taken for 5 to 10 years. You will see the pill pack for the first time when you go to the pharmacy. |
| How does the treatment work?                                                                         | The pills block a hormone called oestrogen to stop or slow the cancer growing.                                                                                                                                                   | The hormone therapy pills block the growth of the cancer cells, which is a hormone called oestrogen.                                                                                                                                                                                                                                                                                         |
| Is there a difference between the treatments in how long you will live or if the cancer will spread? | On average, there is no difference between the treatments in how long you will live or if the cancer will spread. For an individual woman, there is a slight benefit of one treatment over the other.                            | On average, there is no difference between the treatments in how long you will live or if the cancer will spread. For an individual woman, there is a slight benefit of one treatment over the other.                                                                                                                                                                                        |
| What are the chances of the cancer coming back?                                                      | There is a risk that the cancer will come back again in the breast or in other parts of the body. If the hormone pills are not taken, the risk of the cancer coming back is slightly higher than if the hormone pills are taken. | There is a risk that the cancer will come back again in the breast or in other parts of the body. If the hormone pills are not taken, the risk of the cancer coming back is slightly higher than if the hormone pills are taken.                                                                                                                                                             |

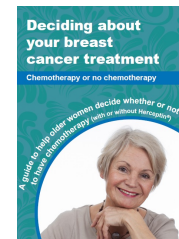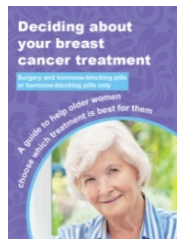

Supplement: MOESM2 [file 13063_2021_5360_MOESM2_ESM.pdf]
