# Supplementary material for: Process evaluation of the Bridging the Age Gap in Breast Cancer decision support intervention cluster randomised trial
Source: Springer Nature journal article supplement (doi:10.1186/s13063-021-05360-z), 2021-07-13
Supplement: MOESM1 [file 13063_2021_5360_MOESM1_ESM.pdf]

## **Process evaluation of the Bridging the Age Gap in Breast Cancer decision support intervention cluster randomised trial**

BURTON, Maria <<http://orcid.org/0000-0002-5411-8181>>, LIFFORD, Kate J., WYLD, Lynda, ARMITAGE, Fiona, RING, Alistair, NETTLESHIP, Anthony, COLLINS, Karen, MORGAN, Jenna, REED, Malcolm W. R., HOLMES, Geoffrey R., BRADBURN, Mike, GATH, Jacqui, GREEN, Tracy, REVELL, Deirdre, BRAIN, Kate, EDWARDS, Adrian, HARDER, Helena, WARD, Susan, RICHARDS, Paul, MARTIN, Charlene, CHATER, Tim, PEMBERTON, Kirsty, MURRAY, Christopher, WALTERS, Stephen, HERBERT, Esther, ROBINSON, Thompson, CHEUNG, Kwok Leung and AUDISIO, Riccardo

Available from Sheffield Hallam University Research Archive (SHURA) at:

<http://shura.shu.ac.uk/28832/>

---

This document is the author deposited version. You are advised to consult the publisher's version if you wish to cite from it.

### **Published version**

BURTON, Maria, LIFFORD, Kate J., WYLD, Lynda, ARMITAGE, Fiona, RING, Alistair, NETTLESHIP, Anthony, COLLINS, Karen, MORGAN, Jenna, REED, Malcolm W. R., HOLMES, Geoffrey R., BRADBURN, Mike, GATH, Jacqui, GREEN, Tracy, REVELL, Deirdre, BRAIN, Kate, EDWARDS, Adrian, HARDER, Helena, WARD, Susan, RICHARDS, Paul, MARTIN, Charlene, CHATER, Tim, PEMBERTON, Kirsty, MURRAY, Christopher, WALTERS, Stephen, HERBERT, Esther, ROBINSON, Thompson, CHEUNG, Kwok Leung and AUDISIO, Riccardo (2021). Process evaluation of the Bridging the Age Gap in Breast Cancer decision support intervention cluster randomised trial. *Trials*, 22 (1), p. 447.

---

### **Copyright and re-use policy**

See <http://shura.shu.ac.uk/information.html>

Sheffield Hallam University Research Archive

<http://shura.shu.ac.uk>



# Age Gap

## Baseline (RCT)

FOR OFFICE USE ONLY

Enrolment No.

|   |  |  |  |  |  |
|---|--|--|--|--|--|
| E |  |  |  |  |  |
|---|--|--|--|--|--|

## Treatment decision support consultations

To be completed by the treating clinician or clinical nurse specialist as soon as possible after the treatment decision support consultation(s) took place.

### Was there a consultation about treatment with primary endocrine therapy or surgery and adjuvant endocrine therapy?

Yes  No

Date of consultation 

|   |   |   |   |   |   |   |   |
|---|---|---|---|---|---|---|---|
|   |   |   |   |   |   |   |   |
| d | d | m | m | y | y | y | y |

Was the patient offered a choice between primary endocrine therapy or surgery and adjuvant endocrine therapy?

Yes  No

Did the patient follow the recommended treatment?

Yes  No

Following this consultation, please:

- complete the **Treatment decision** form
- provide the participant with the relevant **Treatment options and decision questionnaire** if they:
  - are a full participant
  - were offered a choice between primary endocrine therapy or surgery and adjuvant endocrine therapy
  - have not already completed it in relation to a choice between chemotherapy or no chemotherapy

### Was there a consultation about whether or not to have chemotherapy?

Yes  No

Date of consultation 

|   |   |   |   |   |   |   |   |
|---|---|---|---|---|---|---|---|
|   |   |   |   |   |   |   |   |
| d | d | m | m | y | y | y | y |

Was the patient offered a choice between chemotherapy or no chemotherapy?

Yes  No

Did the patient follow the recommended treatment?

Yes  No

Following this consultation, please:

- complete the **Treatment decision** form
- provide the participant with the relevant **Treatment options and decision questionnaire** if they:
  - are a full participant
  - were offered a choice between chemotherapy or no chemotherapy
  - have not already completed it in relation to a choice between primary endocrine therapy or surgery and adjuvant endocrine therapy
