# Supplementary material for: Process evaluation of the Bridging the Age Gap in Breast Cancer decision support intervention cluster randomised trial
Source: Springer Nature journal article supplement (doi:10.1186/s13063-021-05360-z), 2021-07-13
Supplement: MOESM2 [file 13063_2021_5360_MOESM2_ESM.pdf]

## **Process evaluation of the Bridging the Age Gap in Breast Cancer decision support intervention cluster randomised trial**

BURTON, Maria <<http://orcid.org/0000-0002-5411-8181>>, LIFFORD, Kate J., WYLD, Lynda, ARMITAGE, Fiona, RING, Alistair, NETTLESHIP, Anthony, COLLINS, Karen, MORGAN, Jenna, REED, Malcolm W. R., HOLMES, Geoffrey R., BRADBURN, Mike, GATH, Jacqui, GREEN, Tracy, REVELL, Deirdre, BRAIN, Kate, EDWARDS, Adrian, HARDER, Helena, WARD, Susan, RICHARDS, Paul, MARTIN, Charlene, CHATER, Tim, PEMBERTON, Kirsty, MURRAY, Christopher, WALTERS, Stephen, HERBERT, Esther, ROBINSON, Thompson, CHEUNG, Kwok Leung and AUDISIO, Riccardo

Available from Sheffield Hallam University Research Archive (SHURA) at:

<http://shura.shu.ac.uk/28832/>

---

This document is the author deposited version. You are advised to consult the publisher's version if you wish to cite from it.

### **Published version**

BURTON, Maria, LIFFORD, Kate J., WYLD, Lynda, ARMITAGE, Fiona, RING, Alistair, NETTLESHIP, Anthony, COLLINS, Karen, MORGAN, Jenna, REED, Malcolm W. R., HOLMES, Geoffrey R., BRADBURN, Mike, GATH, Jacqui, GREEN, Tracy, REVELL, Deirdre, BRAIN, Kate, EDWARDS, Adrian, HARDER, Helena, WARD, Susan, RICHARDS, Paul, MARTIN, Charlene, CHATER, Tim, PEMBERTON, Kirsty, MURRAY, Christopher, WALTERS, Stephen, HERBERT, Esther, ROBINSON, Thompson, CHEUNG, Kwok Leung and AUDISIO, Riccardo (2021). Process evaluation of the Bridging the Age Gap in Breast Cancer decision support intervention cluster randomised trial. *Trials*, 22 (1), p. 447.

---

### **Copyright and re-use policy**

See <http://shura.shu.ac.uk/information.html>

Sheffield Hallam University Research Archive

<http://shura.shu.ac.uk>



# Age Gap

## Baseline (RCT)

FOR OFFICE USE ONLY

Enrolment No.

|   |  |  |  |  |  |
|---|--|--|--|--|--|
| E |  |  |  |  |  |
|---|--|--|--|--|--|

## Treatment decision

To be completed by the treating clinician or clinical nurse specialist following the patient's treatment consultation.

### 1. Which treatment options were discussed?

(tick one only – complete an additional form if necessary)

Chemotherapy or no chemotherapy

Primary endocrine therapy or surgery and adjuvant endocrine therapy

### 2. Which components of the intervention tools were used and how?

#### a. Age Gap Online Decision Tool

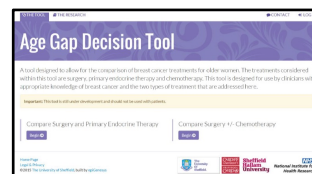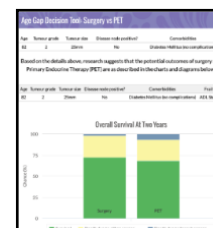

i. Used by the clinical staff to aid their decision making  Yes  No

Tick all that apply

Not enough time

Patient not felt suitable

Not liked by clinical staff

No online access in clinic

Patient already made a decision

Other \_\_\_\_\_

ii. Shown to the patient and discussed in the presence of the doctor or clinical nurse specialist

Yes  No

Tick all that apply

Not enough time

Patient not felt suitable

Not liked by clinical staff

No online access in clinic

Other \_\_\_\_\_

Patient too distressed

Patient unable to understand

Patient already made a decision

Family/carer reluctance

iii. Print out taken home by patient

Yes  No

Tick all that apply

Not enough time

Patient not felt suitable

Not liked by clinical staff

No online access in clinic

Not offered

Other \_\_\_\_\_

Patient too distressed

Patient unable to understand

Patient already made a decision

Patient reluctance

Family/carer reluctance

# Age Gap

## Baseline (RCT)

FOR OFFICE USE ONLY

Enrolment No. E

|  |  |  |  |  |
|--|--|--|--|--|
|  |  |  |  |  |
|--|--|--|--|--|

## Treatment decision

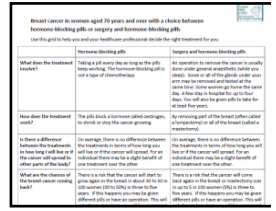

### b. Option grid

i. Used within the consultation  Yes  No

*Tick all that apply*

|                                                      |                                                          |
|------------------------------------------------------|----------------------------------------------------------|
| <input type="checkbox"/> Not enough time             | <input type="checkbox"/> Patient too distressed          |
| <input type="checkbox"/> Patient not felt suitable   | <input type="checkbox"/> Patient unable to understand    |
| <input type="checkbox"/> Not liked by clinical staff | <input type="checkbox"/> Patient already made a decision |
| <input type="checkbox"/> Not available in clinic     | <input type="checkbox"/> Patient reluctance              |
| <input type="checkbox"/> Other _____                 | <input type="checkbox"/> Family/carer reluctance         |

ii. Taken home by patient  Yes  No

*Tick all that apply*

|                                                      |                                                          |
|------------------------------------------------------|----------------------------------------------------------|
| <input type="checkbox"/> Not enough time             | <input type="checkbox"/> Patient too distressed          |
| <input type="checkbox"/> Patient not felt suitable   | <input type="checkbox"/> Patient unable to understand    |
| <input type="checkbox"/> Not liked by clinical staff | <input type="checkbox"/> Patient already made a decision |
| <input type="checkbox"/> Not available in clinic     | <input type="checkbox"/> Patient reluctance              |
| <input type="checkbox"/> Not offered                 | <input type="checkbox"/> Family/carer reluctance         |
| <input type="checkbox"/> Other _____                 |                                                          |

### c. Booklet "Deciding about your breast cancer treatment"

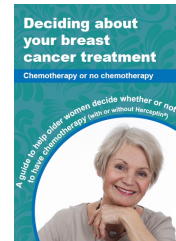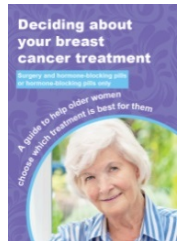

i. Used within the consultation  Yes  No

*Tick all that apply*

|                                                      |                                                          |
|------------------------------------------------------|----------------------------------------------------------|
| <input type="checkbox"/> Not enough time             | <input type="checkbox"/> Patient too distressed          |
| <input type="checkbox"/> Patient not felt suitable   | <input type="checkbox"/> Patient unable to understand    |
| <input type="checkbox"/> Not liked by clinical staff | <input type="checkbox"/> Patient already made a decision |
| <input type="checkbox"/> Not available in clinic     | <input type="checkbox"/> Patient reluctance              |
| <input type="checkbox"/> Other _____                 | <input type="checkbox"/> Family/carer reluctance         |

ii. Taken home by patient  Yes  No

*Tick all that apply*

|                                                      |                                                          |
|------------------------------------------------------|----------------------------------------------------------|
| <input type="checkbox"/> Not enough time             | <input type="checkbox"/> Patient too distressed          |
| <input type="checkbox"/> Patient not felt suitable   | <input type="checkbox"/> Patient unable to understand    |
| <input type="checkbox"/> Not liked by clinical staff | <input type="checkbox"/> Patient already made a decision |
| <input type="checkbox"/> Not available in clinic     | <input type="checkbox"/> Patient reluctance              |
| <input type="checkbox"/> Not offered                 | <input type="checkbox"/> Family/carer reluctance         |
| <input type="checkbox"/> Other _____                 |                                                          |
